# Supplementary material for: Similar Personality Changes among Younger and Older Adults: Findings from a Multi-Method Intervention Study on Socio-Emotional States and Traits
Source: Research Square preprint supplement (doi:10.21203/rs.3.rs-6206183/v1), 2025-04-15
Supplement: Supplementary file 1 [file 2109c674292734c58743032b.docx]

**Supplementary Material to
Similar Personality Changes among Younger and Older Adults: Findings from a Multi-Method Intervention Study on Socio--Emotional States and Traits**

| **Table S1**  *Detailed Overview of Each Session during the 8-week Socio-Emotional Functioning Intervention* | |
| --- | --- |
| Module 1: Stress and Stress Synthesis | |
| **Content** | **Exercises/Reflection** |
| *Introduction to the training:*  Training framework;  Change model  *Psychoeducation on stress:*  Definition of stress and stressors;  Stress theory (Lazarus & Folkman, 1984);  Physiology of stress;  Stressor-response sequence;  Parasympathetic and sympathetic nervous system  *How to approach sustainable change* | *Audio “Value reflection”:*  Reasons for participation  *Written self-reflection:*  Analysis of the current and the desired state in dealing with stress;  Analysis of resources and obstacles for change;  Commitment to change goal(s)  *Audio “Nourishing moment”:*  Visualization of a nourishing daily life moment (creating feelings of safeness, calmness, contentment)  *Everyday tasks:*  Audio “Nourishing moment”;  Differentiation of pleasant and unpleasant body sensations;  Getting to know the Buddy |
| Module 2: Resilience and Resources | |
| **Content** | **Exercises/Reflection** |
| *Psychoeducation on resilience:*  Definition;  Resilient (elastic) zone;  Resilience factors;  Perspectives on level of functioning  *Collection of immediate help strategies;*  Dealing with anomalies and uncertainties    *Psychoeducation resources:*  Characteristics;  Internal and external resources | *Arrival with audio “Nourishing moment” & dyadic/ group exchange*  *Audio "Bodyscan":*  Conscious perception of body parts  *"Resource Shower":*  Getting to know own resources and strengths through external assessment  Goal: Promoting self- and other-awareness, enhancing group solidarity  *Written self-reflection:*  Personal strengths and resources;  Use of “immediate stress remedies”  *Everyday tasks:*  Audio “Bodyscan”;  Identification of everyday stressors, own resources and immediate stress remedies;  "Resource interview": reciprocal interview with Buddy on strengths and resources |
| Module 3: Attention and Attention Regulation | |
| **Content** | **Exercises/Reflection** |
| *Psychoeducation on attention:*  Definition of attention and its core characteristics;  Stability versus clarity of attention;  Benefits and mechanisms of attention regulation  *Psychoeducation on needs and values:*  Definition and differentiation of  needs and values;  Identification of own needs and values | *Arrival with audio “Nourishing moment” & dyadic/ group exchange*  *Audio "Focus on the Breath" & written self-reflection:*  Conscious awareness of the breath to train attention;  Reflection on experiences of difficulty/ease with this exercise  *Written self-reflection:*  Identification of needs and values  *Everyday tasks:*  Audio "Focus on the Breath";  “Values Interview”: reciprocal interview with Buddy on needs and values and how they relate to their resources;  One mindful daily activity per day (with attention to bodily sensations, thoughts, and feelings)  Exchange with the buddy |
| Module 4: Emotions and Emotion-Regulation | |
| **Content** | **Exercises/Reflection** |
| *Psychoeducation on emotions and emotion regulation:*  Definition of emotions, emotion regulation, stimulus-response patterns;  Differentiation of affect, mood, and emotion;  The role of attention in emotion regulation;  Ability to distinguish and self-regulate  *Psychoeducation on self-care:*  Definition of self-care;  Self-compassionate attitude;  Friendly and critical self-verbalization;  Negative thought and emotion spirals;  Acceptance versus change | *Arrival with audio “Focus on the Breath” & dyadic/ group exchange*  *Audio "Open Monitoring":*  Conscious awareness of all present-moment sensations/experiences;  Sharpen the attention  *Written self-reflection:*  Reflection on focus versus distraction ;  Identification of habitual stimulus-response patterns  *Exercise "Untangling a knot"*  Perceiving thoughts and body sensations with a difficult/unsolvable task under time pressure and transfer to everyday situations  *Written self-reflection*  Alternatives to habitual stimulus-response patterns;  *Everyday tasks:*  Audio "Open monitoring";  Reflection of emotions throughout the day;  Attention to habitual self-verbalization;  Identification of (habitual) stimulus-response patterns;  Exchange with the buddy |
| Module 5: Social Relationships and Social Behavior | |
| **Content** | **Exercises/Reflection** |
| *Conclusion of the first topic "Dealing with stress"*  Reflection on change goals and developmental process  *Psychoeducation on social relationships and socially competent behavior:*  Characteristics of social relationships;  Definition of social learning;  Common aims of social interactions;  Basics of communication;  Constructivism: reality construction, interdependence, circularity and feedback loops  *Introduction to the three types of relationship situations:*   1. taking responsibility and setting healthy boundaries 2. getting into contact/ relationships 3. staying in relationships/resonance;   *Repetition: How to approach sustainable change* | *Arrival with audio “Open Monitoring” & dyadic/ group exchange*  *Written self-reflection and interim assessment:*  Comparison of past, current, and desired state;  Changes in dealing with stress;  Use of strengths and resources;  Goal adjustments and next steps  *"Attentive dialog" exercise on change goals:*  Attentive listening and feeling;  Reflecting on the current situation in social relationships;  Incorporating resources, needs, and values in social relationships  *Written self-reflection:*  Analysis of the current and the desired state in dealing with social relationships;  Analysis of resources and obstacles for change;  Commitment to change goal(s)  *Everyday tasks:*  Audio "Open monitoring";  Interview "Perception of self and others in social relationships": Interviewing a trusted person on the external perception of the participant in social situations;  Exchange with the buddy |
| Module 6 and Module 7: Practical Exercises I and II | |
| **Content** | **Exercises/Reflection** |
| *Practical training module:*  Explanation and introduction of videotaped fictive role plays for different social situations;  Specification of the three types of relationship situations and role-plays selecting a situation from one of the types:   1. taking responsibility and setting healthy boundaries 2. getting into contact/ relationships 3. staying in relationships/resonance; | *Arrival with audio “Open Monitoring” & dyadic/ group exchange*  *Role play in two smaller groups and one trainer with video recording and video feedback:*  Re-enactment of a challenging everyday social situation;  (Positive) Feedback (from self, trainer, sometimes group)  Second round with adaptions  *Everyday tasks:*  Audio "Open monitoring";  Practice some social situations in “real life” and reflection on these;  Exchange with the buddy |
| Module 8: Review and Outlook | |
| **Content** | **Exercises/Reflection** |
| *Summary of training and outlook on everyday life in the future:*  Appreciation of what has been achieved and planning of next steps | *Arrival with audio “Open Monitoring” & dyadic/ group exchange*  *Self-reflection:*  Comparison of past, current, and desired state;  Changes in dealing with social relationships;  Use of strengths and resources;  Goal adjustments and next steps  *Exchange in the group:*  Final reflection;  Personal highlights and "AHA moments" |

*Note*. Reprinted from –blinded for review---, under review.

| **Table S2**  *Changes in Personality States Across the Intervention* | | |
| --- | --- | --- |
| **Fixed Effect** | **State Emotional Stability** | **State Extraversion** |
| **Intercept**  Estimate (SE)  95% CI | **4.11 (0.08)**  [3.95, 4.27] | **4.70 (0.08)**  [4.55, 4.85] |
| **Time**  Estimate (SE)  95% CI | **0.09 (0.02)**  [0.06, 0.13] | **0.06 (0.01)**  [0.03, 0.08] |
| **Age Groupa** Estimate (SE)  95% CI | 0.19 (0.19)  [-0.13, 0.50] | 0.20 (0.16)  [-0.11, 0.50] |
| **Time by Age Group**  Estimate (SE)  95% CI | -0.01 (0.03)  [-0.08, 0.05] | -0.01 (0.02)  [-0.06, 0.03] |
| *Note*. a 0 = younger adults, 1 = older adults, grand-mean centered. Coefficient with *p*-values <.05 are bolded. | | |

**Table S3**

*Changes in Social Personality States Across the Intervention with a Discontinuous Time Variable*

| **Fixed Effect** | **State Social Behavior** |
| --- | --- |
| **Intercept**  Estimate (SE)  95% CI | **4.72 (0.08)**  [4.55, 4.88] |
| **Time**  Estimate (SE)  95% CI | 0.04 (0.03)  [-0.01, 0.10] |
| **Time Discontinuousa**  Estimate (SE)  95% CI | 0.03 (0.02)  [-0.30, 0.35] |
| **Age Groupb** Estimate (SE)  95% CI | 0.14 (0.13)  [-0.10, 0.39] |
| **Time by Time Discontinuous**  Estimate (SE)  95% CI | 0.01 (0.04)  [-0.07, 0.09] |

*Note*. *N* = 165. 0 = younger adults, 1 = older adults, grand-mean centered.

Coefficient with *p*-values< .05 are bolded.

**Table S4**

*Longitudinal Change in Explicit and Implicit Self-Concepts of Emotional Stability and Extraversion*

| **Model** | | | **Emotional stability** | | **Extraversion** | |
| --- | --- | --- | --- | --- | --- | --- |
|  | |  | Estimate [95% CI] | *p* | Estimate [95% CI] | *p* |
| **Explicit** | | |  |  |  |  |
| *Trait changes* | | |  |  |  |  |
|  | Change T1–T2 | | 0.321 [0.229, 0.412] | **<.001** | 0.161 [0.098, 0.225] | **<.001** |
|  | Change T2–T3 | | 0.319 [0.222, 0.416] | **<.001** | 0.072 [0.004, 0.140] | **.037** |
|  | Neighborhood change T1–T2🡪 T2–T3 | | -0.398 [-0.621,-0.174] | **<.001** | -0.088 [-0.380, 0.203] | .552 |
| *Age differences in change* | | |  |  |  |  |
|  | Change T1–T2 | | 0.042 [-0.109, 0.192] | .586 | -0.004 [-0.123, 0.116] | .953 |
|  | Change T2–T3 | | 0.092 [-0.037, 0.221] | .162 | 0.049 [-0.056, 0.154] | .359 |
| **Implicit** | | |  |  |  |  |
| *Trait changes* | | |  |  |  |  |
|  | Change T1–T2 | | 0.002 [-0.059, 0.063] | .944 | 0.098 [0.024, 0.172] | **.009** |
|  | Change T2–T3 | | -0.049 [-0.105, 0.006] | .082 | 0.062 [0.000, 0.124] | .051 |
|  | Neighborhood change T2–T1 🡪 T2–T3 | | -0.025 [-0.047, -0.004] | **.019** | -0.324 [-0.570, -0.077] | **.010** |
| *Age differences in change* | | |  |  |  |  |
|  | Change T1–T2 | | 0.033 [-0.068,0.134] | .520 | -0.090 [-0.220, 0.040] | .174 |
|  | Change T2–T3 | | -0.008 [-0.116, 0.100] | .887 | 0.024 [-0.083, 0.132] | .657 |

*Note*. *N* = 165. Coefficient with *p*-values< .05 are bolded.

| **Table S5**  *Model Fit Indices of Latent Difference Models* | | | | | |
| --- | --- | --- | --- | --- | --- |
| **Model** | χ*2* | CFI | TLI | RMSEA | SRMR |
| ES explicit | 43.985 | 0.992 | 0.990 | 0.037 | 0.052 |
| EX explicit | 37.642 | 0.999 | 0.998 | 0.017 | 0.070 |
| ES implicit | 6.666 | 1.000 | 1.000 | 0.000 | 0.031 |
| EX implicit | 5.199 | 1.000 | 1.000 | 0.000 | 0.018 |
| *Note.* CFI = Comparative fit index; TLI = Tucker-Lewis index; RMSEA = Root mean square error of approximation; SRMR = Standardized root mean square residual. | | | | | |

**Table S6**

*State-Trait Associations and Moderations by Age in Longitudinal Change in the Explicit and Implicit Self-Concepts of Emotional Stability and Extraversion*

| **Model** | | **Emotional stability** | | | **Extraversion** | | |
| --- | --- | --- | --- | --- | --- | --- | --- |
|  |  | Estimate  [95% CI] | *Posterior SD* | *p* | Estimate  [95% CI] | *Posterior SD* | *p* |
| **Explicit** | |  |  |  |  |  |  |
| *a* Association of intercepts | | 0.237  [0.143, 0.356] | 0.054 | **<.001** | 0.364  [0.238, 0.524] | 0.073 | **<.001** |
| *b* State changes predict trait changes | | 0.367  [0.191, 0.674] | 0.132 | **<.001** | 0.010  [-0.239, 0.290] | 0.135 | .458 |
| *c* State changes moderated by age group predict trait changes | | -0.148  [-0.414, 0.092] | 0.128 | .111 | -0.029  [-0.392, 0.322] | 0.184 | .431 |
| **Implicit** | |  |  |  |  |  |  |
| *a* Association of Intercepts | | 0.015  [-0.039, 0.070] | 0.027 | .289 | **0.091**  **[0.020, 0.175]** | **0.039** | **.006** |
| *b* State changes predict trait changes | | 0.018  [-0.059, 0.117] | 0.044 | .317 | 0.010  [-0.942, 0.299] | 0.291 | .465 |
| *c* State changes moderated by age group predict trait changes | | 0.039 [-0.139, 0.224] | 0.092 | .322 | -0.116  [-2.033, 0.450] | 0.571 | .294 |

*Note*. *N* = 165. Coefficient with *p*-values< .05 are bolded.

**Table S7**

*Longitudinal Change in Explicit and Implicit Self-Concepts of Emotional Stability and Extraversion Predicted bv States Changes with Bayes Estimator*

| **Model** | | **Emotional stability** | | | **Extraversion** | | |
| --- | --- | --- | --- | --- | --- | --- | --- |
|  |  | Estimate  [95% CI] | *Posterior SD* | *p* | Estimate  [95% CI] | *Posterior SD* | *p* |
| **Explicit** | |  |  |  |  |  |  |
| *a* Association of Intercepts | | 0.243  [0.146, 0.364] | 0.055 | **<.001** | 0.369  [0.246, 0.531] | 0.073 | **<.001** |
| *b* State changes predict trait changes | | 0.330  [0.186, 0.592] | 0.106 | **<.001** | 0.023  [-0.282, 0.187] | 0.113 | .397 |
| *c* Age group | | 0.012  [-0.006, 0.029] | 0.009 | .090 | 0.005  [-0.012, 0.021] | 0.008 | .273 |
| **Implicit** | |  |  |  |  |  |  |
| *a* Association of Intercepts | | 0.015  [-0.039, 0.070] | 0.028 | .293 | 0.095  [0.020, 0.183] | 0.041 | **.006** |
| *b* State changes predict trait changes | | 0.022  [-0.057, 0.103] | 0.040 | .287 | 0.039  [-0.136, 0.217] | 0.092 | .313 |
| *c* Age group | | 0.004  [-0.010, 0.017] | 0.007 | .286 | -0.005  [-0.021, 0.012] | 0.008 | .264 |

*Note*. *N* = 165. 0 = younger adults, 1 = older adults, grand-mean centered. Coefficient with *p*-values< .05 are bolded.

**Table S8**

| *Model Fit Indices of Latent Growth Models with Bayes Estimator* | | | | | |
| --- | --- | --- | --- | --- | --- |
| **Model** |  | CFI | TLI | RMSEA | BIC |
| ES explicit |  | 0.971 | 0.971 | 0.042 | 5573.280 |
| EX explicit |  | 1.000 | 1.000 | 0.000 | 4244.147 |
| ES implicit |  | 0.992 | 0.992 | 0.025 | 4966.628 |
| EX implicit |  | 1.000 | 1.000 | 0.000 | 4001.943 |
| *Note.* CFI = Comparative fit index; TLI = Tucker-Lewis index; RMSEA = Root mean square error of approximation; BIC = Bayesian information criteria. | | | | | |

**Table S9**

*Longitudinal Change in Explicit and Implicit Self-Concepts of Emotional Stability and Extraversion*

*Across the Intervention and Follow-Up Period*

| **Model** | | **Emotional stability** | | | **Extraversion** | | |
| --- | --- | --- | --- | --- | --- | --- | --- |
|  |  | Estimate  [95% CI] | *Posterior SD* | *p* | Estimate  [95% CI] | *Posterior SD* | *p* |
| **Explicit** | |  |  |  |  |  |  |
| Trait changes across the intervention | | 0.265  [0.221, 0.308] | 0.022 | **<.001** | 0.100  [0.060, 0.140] | 0.020 | **<.001** |
| Trait changes across follow-up period | | 0.004  [-0.006, 0.014] | 0.005 | .201 | -0.010  [-0.017, -0.003] | 0.003 | **.002** |
| Age group predicting changes across the follow-up period | | 0.004  [-0.014, 0.023] | 0.009 | .327 | -0.002  [-0.015, 0.010] | 0.006 | .384 |
| **Implicit** | |  |  |  |  |  |  |
| Trait changes across the intervention | | -0.024  [-0.058, 0.009] | 0.017 | .075 | 0.065  [0.026, 0.104] | 0.020 | **<.001** |
| Trait changes across the follow-up period | | 0.005  [-0.002, 0.011] | 0.003 | .069 | 0.006  [-0.002, 0.013] | 0.004 | .064 |
| Age group predicting changes across the follow-up period | | 0.010  [-0.004, 0.022] | 0.006 | .071 | 0.016  [0.001, 0.031] | 0.008 | **.017** |

*Note*. *N(T4) = 123, n(T5) = 100*. Age group (0 = younger adults, 1 = older adults) was grand mean

centered. Coefficient with *p*-values< .05 are bolded.

**Table S10**

*BIC Differences of Latent Growth Models With and Without Age Group as Predictor*

| **Model** |  | **BIC H1**  **(with)** | **BIC H0**  **(without)** | **BIC Difference** | **Evidence against H1 (Bayes factor)** |
| --- | --- | --- | --- | --- | --- |
| *State-Trait Associations across the Intervention* | | | | |  |
| ES explicit |  | 5573.280 | 5569.990 | 3.290 | Positive evidence for H0 (3 to 20) |
| EX explicit |  | 4966.628 | 4962.019 | 4.609 |
| ES implicit |  | 4244.147 | 4238.938 | 5.209 |
| EX implicit |  | 4001.943 | 3997.744 | 4.199 |
| *Trait Changes Across the Intervention and Follow-Up Period* | | | | |  |
| ES explicit |  | 2772.628 | 2765.595 | 7.033 | Strong evidence for H0  (20 to 150) |
| EX explicit |  | 2515.943 | 2519.518 | 3.575 | Positive evidence for H0  (3 to 20) |
| ES implicit |  | 739.120 | **734.088** | 5.032 |
| EX implicit |  | 1069.906 | 1063.747 | -6.159 | Strong evidence for H1  (20 to 150) |

| **Table S11**  *Age Differences in the Engagement in the Intervention and Context Factors* | | | | |
| --- | --- | --- | --- | --- |
| Variables M(SD) | Younger Adults | Older  Adults | *t (df*) | *p* |
| **Desire to Change** |  |  |  |  |
| Emotional Stability | 4.13a (0.56) | 4.02a (0.59) | 1.29 (158.78) | .199 |
| Extraversion | 3.60a (0.55) | 3.40b (0.56) | 2.24 (159) | **.026** |
| **Engagement** |  |  |  |  |
| Weekly tasks | 3.49a (1.14) | 4.31b (1.00) | -4.89 (155.15) | **< .001** |
| Practicing with audio files | 3.08a (1.40) | 3.89b (1.44) | -3.64 (159.90) | **< .001** |
| Exchanging with Buddy | 2.13a (0.61) | 2.23a (0.73) | -0.95 (157.28) | .340 |
| Practicing in daily live | 4.10a (1.10) | 4.38a (0.99) | -1.60 (156.19) | .110 |
| **Context factors** |  |  |  |  |
| Hectic Week | 4.48a (0.89) | 4.11b (0.99) | 2.49 (159.49) | **.013** |
| Exhausting Week | 4.31a (0.73) | 4.32b (0.63) | -0.10 (153.60) | .921 |
| Atypical Week | 4.33a (0.96) | 3.80b (1.13) | 3.23 (158.04) | **.002** |
| *Note*. Means with different subscripts differ significantly between age groups, with *p* < .05. | | | | |

**Table S12**

*Deviations from the Preregistration*

| **Preregistration** | **Deviation** | **Reasoning** |
| --- | --- | --- |
| **Hypotheses** |  | The hypotheses were rephrased to improve grammatical clarity and consistency as well as avoiding repetitive phrasing |
| H1a: Over the course of the training, state emotional well-being improves continuously.  H1b. Over the course of the training, state social behavior improves. The improvement is more pronounced during the second half of the training, which focuses on social competencies. (Prereg 1) | (…) over the course of the intervention, state emotional stability (H1a) and state extraversion (H1b) would improve continuously. Regarding the latter, we further stated that the improvement would be more pronounced during the second half of the intervention, which focused on social competencies. |
| H1a: Participation in the social-emotional competence training leads to increases in the explicit self-concept of emotional stability.  H1b: Participation in the social-emotional competence training leads to increases in the explicit self-concept of extraversion. (Prereg 2) | (…) we expected that the intervention would lead to increases in the explicit self-concept of emotional stability (H2a) and extraversion (H2b) |
| H2a. Participation in the social-emotional competence training leads to increases in the implicit self-concept of emotional stability.  H2b. Participation in the social-emotional competence training leads to increases in the implicit self-concept of extraversion. (Prereg 2) | (…) as well as the implicit self-concepts of both traits (H3a and H3b, respectively) |
| H3. Participation in the social-emotional competence training leads to more pronounced increases in explicit trait self-concepts compared to implicit trait self-  concepts. (Prereg 2) | (…) we expected more pronounced increases explicit trait self-concepts compared to implicit trait self-concepts (H4) |
| H3a: More pronounced changes in state emotional  well-being are associated with stronger changes in  trait emotional stability.  H3c: More pronounced changes in state social  behavior are associated with stronger changes in trait  extraversion. (Prereg 1) | We hypothesized that more pronounced changes in state emotional well-being would be associated with stronger changes in trait emotional stability (H5a) and more pronounced changes in state social behavior with stronger changes in trait extraversion (H5b). |
| H2a. Increases in state emotional well-being are more pronounced among younger adults compared to older adults.  H2b. Improvement in state social behavior is more pronounced among younger adults compared to older adults. (Prereg 1) | We (…) hypothesized that the increases in state emotional well-being (H6a) and social behavior (H6b) would be more pronounced among younger adults compared to older adults. |
| H4a: Increases in explicit self-concepts are more pronounced among younger adults compared to older adults.  H4b. Increases in implicit self-concepts are more pronounced among younger adults compared to older adults. (Prereg 2) | (…) we expected (H7a) that increases in explicit self-concepts and implicit self-concepts (H7b) are more pronounced among younger adults compared to older adults. |
| H3b: The association between changes in state emotional well-being and trait emotional stability is more pronounced in younger adults compared to older adults.  H3d: The association between changes in state social behavior and trait extraversion is more pronounced in younger adults compared to older adults. (Prereg 1) | (…) we also expected that the association between changes in state emotional well-being and trait emotional stability (H8a), and social behavior and extraversion (8b) would be more stronger in younger adults compared to older adults. |
| **Variables**  State social behavior: 6 Items state social behavior; 1 indicator each of social relationship quantity (i.e., frequency) and quality (i.e., mean of pleasantness & closeness) | We did not include indicators of social relationships. | We aimed to maintain a clear and concise focus on the research questions. Further, as we collected for emotional stability also just state indicators it appeared imbalanced to have more indicators for extraversion. |
| **Manipulation of comparisons** During weekly assessments when reflecting on their past week, we assigned participants to focus either on comparing themselves with their previous traits (i.e., past-temporal comparison) or with others (social comparison).  We preregistered separate hypotheses for the comparisons and how they interact with traits and age. | We did not include analyses on comparison conditions in this manuscript. | As the scope of this manuscript was already complex and covered 15 hypotheses, we did not include this aspect of the study to not overburden readers. |
| **Analyses**  For linking state and trait changes we preregistered that if the data quality is sufficient, we use structural equation models that link changes in weekly experiences (i.e., slopes) with trait changes (i.e., latent neighbor change models). | We used a somewhat simpler model with one latent growth factor | Neighborhood change models did not converge. Models with one growth factor seemed reasonable as the change was equal across both study parts. |

**Table S13**

| *Dropout and Attrition Analyses* | | | | | | | | |
| --- | --- | --- | --- | --- | --- | --- | --- | --- |
| Variables *M(SD)* | Completers (*N* = 165)a | Drop-out  (*N* = 38)a | Welch’s *t*(*df*) or χ²(*df*)b | *p* | Adherencec | Attritionc | Welch’s *t*(*df*) or χ²(*df*)d | *p* |
| **Explicit** |  |  |  |  |  |  |  |  |
| Emotional Stability | 3.14 (0.60) | 3.04 (0.58) | -0.94 (51.02) | .352 | 3.25 (0.63) | 326 (0.51) | -0.11 (19.29) | .916 |
| Extraversion | 3.20 (0.63) | 3.33 (0.55) | 1.26 (55.93) | .213 | 3.40 (0.61) | 3.46 (0.42) | -0.53 (21.66) | .599 |
| **Implicit** |  |  |  |  |  |  |  |  |
| Emotional Stability | 0.32 (0.36) | 0.29 (0.29) | -0.50 (48.93) | .618 | 0.30 (0.41) | 0.11 (0.36) | 1.77 (17.07) | .095 |
| Extraversion | -0.20 (0.53) | -0.15 (0.54) | 0.47 (44.10) | .638 | -0.10 (0.56) | 0.11 (0.55) | -1.32 (16.19) | .207 |
| Age | 46.26 (18.70) | 47.81 (18.60) | 0.46 (53.58) | .649 | 45.38 (18.32) | 49.32 (19.93) | 1.08 (54.80) | .285 |
| Gender (*n*) |  |  | 1.45 (2) | .484 |  |  | 1.03 (2) | .597 |
| Female | 124 | 24 |  |  | 98 | 26 |  |  |
| Male | 40 | 12 |  |  | 29 | 11 |  |  |
| Non-binary | 1 | 0 |  |  | 1 | 0 |  |  |
| *Note*. 36.3% of the eligible participants (*N* = 203) eventually enrolled in the study. Of these, 18.7% (*n* = 38) decided not to start (*n* = 20) or to end participation prematurely (i.e., did only complete ≤ 4 training sessions; *n* = 18). These are considered a drop-out. aData is available from *n*Completers = 158-165; *n*Drop-out = 30-37 at T1. bMean difference at T1 between completers and drop-out. cAdherence = Participants provided data at T4 and/or T5 (*n* = 124-128). Attrition = Participants did not provide data at either follow-up (*n* = 14-37). dMean difference at T3 between adherence and attrition. | | | | | | | | |

**Table S14**

*Sociodemographic Information on Participants*

| Variable | Overall (*N* = 165) | Younger adults (*n* = 80) | Older adults (*n* = 85) |
| --- | --- | --- | --- |
| **Age** |  |  |  |
| Mean (SD) | 46.26 (18.70) | 28.33 (4.92) | 63.55 (7.20) |
| Range | 19-78 | 19-42 | 50-78 |
| **Gender *n* (%)** |  |  |  |
| Female | 124 (75.15) | 61 (75.31) | 63 (75.00) |
| Male | 40 (24.24) | 19 (23.46) | 21 (25.00) |
| Non-Binary | 1 (0.61) | 1 (1.23) | 0 (0.00) |
| **Education *n* (%)**a |  |  |  |
| Up to middle school degree | 14 (8.48) | 2 (2.47) | 12 (14.29) |
| High school degree | 29 (16.97) | 21 (25.93) | 8 (9.52) |
| College degree (UAS) | 5 (3.03) | 1 (1.23) | 4 (4.76) |
| University degree | 104 (63.03) | 53 (65.43) | 51 (60.71) |
| Other | 9 (5.45) | 4 (4.94) | 5 (5.95) |
| **Job *n* (%)**a |  |  |  |
| Student | 45 (27.27) | 45 (55.56) | 0 (0.00) |
| Employee | 65 (39.39) | 30 (37.04) | 35 (41.67) |
| Self-Employed | 4 (2.42) | 0 (0.00) | 4 (4.76) |
| Pensioner | 36 (21.82) | 0 (0.00) | 36 (42.86) |
| Other | 11 (6.67) | 6 (7.41) | 5 (5.95) |
| **Civil Status *n* (%)**a |  |  |  |
| Married | 48 (29.09) | 9 (11.11) | 39 (46.43) |
| In a relationship | 41 (24.85) | 36 (44.44) | 5 (5.95) |
| Single | 47 (28.48) | 35 (43.21) | 12 (14.29) |
| Divorced | 19 (11.52) | 1 (1.23) | 18 (21.43) |
| Widowed | 6 (3.64) | 0 (0.00) | 6 (7.14) |

| **Kids *n* (%)**a |  |  |  |
| --- | --- | --- | --- |
| None | 97 (58.79) | 76 (93.83) | 21 (25.00) |
| 1 | 17 (10.30) | 3 (3.70) | 14 (16.67) |
| 2 | 35 (21.21) | 1 (1.23) | 34 (40.48) |
| 3 | 9 (5.45) | 1 (1.23) | 8 (9.52) |
| 4 | 3 (1.82) | 0 (0.00) | 3 (3.54) |
| **Net Household Income in € *n* (%)**a |  |  |  |
| < 1.000 | 41 (24.85) | 33 (40.74) | 8 (9.82) |
| 1.000 - 2.000 | 31 (18.79) | 14 (17.28) | 17 (20.24) |
| 2.000 - 3.000 | 42 (25.45) | 18 (22.22) | 24 (28.57) |
| 3.000 - 5.000 | 29 (17.58) | 10 (12.35) | 19 (22.62) |
| 5.000 - 7.500 | 6 (3.64) | 0 (0.000) | 6 (7.14) |
| 7.500 - 10.000 | 2 (1.21) | 0 (0.00) | 2 (2.38) |
| > 10.000 | 1 (0.61) | 0 (0.00) | 1 (1.19) |
| Not indicated | 9 (5.45) | 6 (7.41) | 3 (3.57) |
| *Note*. UAS = University of Applied Sciences | | | |

| **Table S15**  *Correlations Between Explicit and Implicit Self-Concepts at all Measuring Points* | | | | | | | | | | | | | | | | | | | |
| --- | --- | --- | --- | --- | --- | --- | --- | --- | --- | --- | --- | --- | --- | --- | --- | --- | --- | --- | --- |
|  | 1 | 2 | 3 | 4 | 5 | 6 | 7 | 8 | 9 | 10 | 11 | 12 | 13 | 14 | 15 | 16 | 17 | 18 |
| 1. ES explicit T1 |  |  |  |  |  |  |  |  |  |  |  |  |  |  |  |  |  |  |
| 2. ES explicit T2 | **.79** |  |  |  |  |  |  |  |  |  |  |  |  |  |  |  |  |  |
| 3. ES explicit T3 | **.77** | **.84** |  |  |  |  |  |  |  |  |  |  |  |  |  |  |  |  |
| 4. ES explicit T4 | **.73** | **.79** | **.82** |  |  |  |  |  |  |  |  |  |  |  |  |  |  |  |
| 5. ES explicit T5 | **.52** | **.58** | **.66** | **.75** |  |  |  |  |  |  |  |  |  |  |  |  |  |  |
| 6. ES implicit T1 | .08 | .21 | .15 | .10 | -.07 |  |  |  |  |  |  |  |  |  |  |  |  |  |
| 7. ES implicit T2 | **.25** | **.31** | .22 | .19 | .10 | **.48** |  |  |  |  |  |  |  |  |  |  |  |  |
| 8. ES implicit T3 | .20 | **.23** | .16 | .16 | .17 | **.36** | **.49** |  |  |  |  |  |  |  |  |  |  |  |
| 9. ES implicit T5 | .08 | .24 | .12 | .04 | .06 | **.28** | **.46** | **.32** |  |  |  |  |  |  |  |  |  |  |
| 10. EX explicit T1 | **.27** | **.25** | .18 | **.29** | .15 | .07 | .14 | **.25** | .09 |  |  |  |  |  |  |  |  |  |
| 11. EX explicit T2 | **.22** | **.28** | **.23** | **.28** | **.28** | .09 | .18 | .22 | .09 | **.87** |  |  |  |  |  |  |  |  |
| 12. EX explicit T3 | **.23** | **.27** | **.28** | **.31** | **.28** | .07 | .22 | **.23** | .07 | **.86** | **.92** |  |  |  |  |  |  |  |
| 13. EX explicit T4 | **.30** | **.35** | **.32** | **.44** | **.33** | .09 | .18 | .17 | .00 | **.85** | **.87** | **.88** |  |  |  |  |  |  |
| 14. EX explicit T5 | .23 | .20 | .24 | **.37** | **.47** | -.06 | .12 | .18 | .02 | **.76** | **.81** | **.81** | **.83** |  |  |  |  |  |
| 15. EX implicit T1 | **.25** | .17 | .21 | .24 | .17 | -.01 | .00 | .12 | -.16 | **.33** | **.43** | **.41** | **.45** | **.36** |  |  |  |  |
| 16. EX implicit T2 | .14 | .09 | .06 | .17 | .01 | .07 | .07 | .05 | -.21 | **.32** | **.36** | **.32** | **.43** | **.31** | **.64** |  |  |  |
| 17. EX implicit T3 | .05 | .04 | .11 | .16 | .09 | .16 | .10 | .00 | -.13 | **.31** | **.39** | **.34** | **.46** | **.31** | **.57** | **.67** |  |  |
| 18. EX implicit T5 | .12 | .17 | .23 | .22 | .17 | .10 | .09 | -.03 | .01 | .23 | **.29** | **.29** | **.30** | .23 | **.45** | **.50** | **.64** |  |
| 19. Age | -.01 | -.02 | .05 | .07 | .08 | .06 | .05 | .04 | .25 | .00 | -.04 | -.05 | -.11 | -.01 | .02 | -.06 | -.05 | .00 |
| *Note*. ES = Emotional stability, EX = Extraversion. Significant correlations are bolded with *p* < .05. | | | | | | | | | | | | | | | | | | | |

| **Table S16**  *Fit Indices for Models with Different Levels of Measurement Invariance Across the Intervention* | | | | | |
| --- | --- | --- | --- | --- | --- |
| **Model** | χ*2* | CFI | TLI | RMSEA | SRMR |
| **ES explicit** |  |  |  |  |  |
| 1 | 6.549 | 1.000 | 1.018 | 0.000 | 0.023 |
| 2 | 10.317 | 1.000 | 1.015 | 0.000 | 0.025 |
| 3 | 32.983 | 0.998 | 1.010 | 0.051 | 0.053 |
| **EX explicit** |  |  |  |  |  |
| 1 | 11.894 | 1.000 | 1.006 | 0.000 | 0.018 |
| 2 | 15.774 | 1.000 | 1.005 | 0.000 | 0.026 |
| 3 | 16.277 | 1.000 | 1.008 | 0.000 | 0.028 |
| **ES implicit** |  |  |  |  |  |
| 1 | 0.826 | 0.997 | 1.000 | 0.000 | 0.009 |
| 2 | 2.160 | 0.999 | 0.996 | 0.022 | 0.024 |
| 3 | 3.329 | 1.000 | 1.009 | 0.000 | 0.028 |
| **EX implicit** |  |  |  |  |  |
| 1 | 0.385 | 0.999 | 1.000 | 0.000 | 0.004 |
| 2 | 1.892 | 1.000 | 1.001 | 0.000 | 0.020 |
| 3 | 1.927 | 1.000 | 1.013 | 0.000 | 0.020 |
| *Note.* CFI = Comparative fit index; TLI = Tucker-Lewis index; RMSEA = Root mean square error of approximation; SRMR = Standardized root mean square residual. 1 = Unconstrained model/configural measurement invariance; 2 = Model with metric measurement invariance; 3 = Model with strong measurement invariance. For testing Measurement Invariance, we used the following guidelines of Chen (2007) for samples with *N* ≤ 300: To test configural invariance: Change of ≤—.005 in CFI, supplemented by a change of ≥.010 in RMSEA or a change of ≥.025 in RMSEA compared to the less restrictive model would indicate noninvariance: Metric invariance and strong invariance: change of ≥ —.005 in CFI, supplemented by a change of ≥.015 in RMSEA or a change of ≥.010 in SRMR compared to the less restrictive model would indicate noninvariance | | | | | |

**Figure S1**


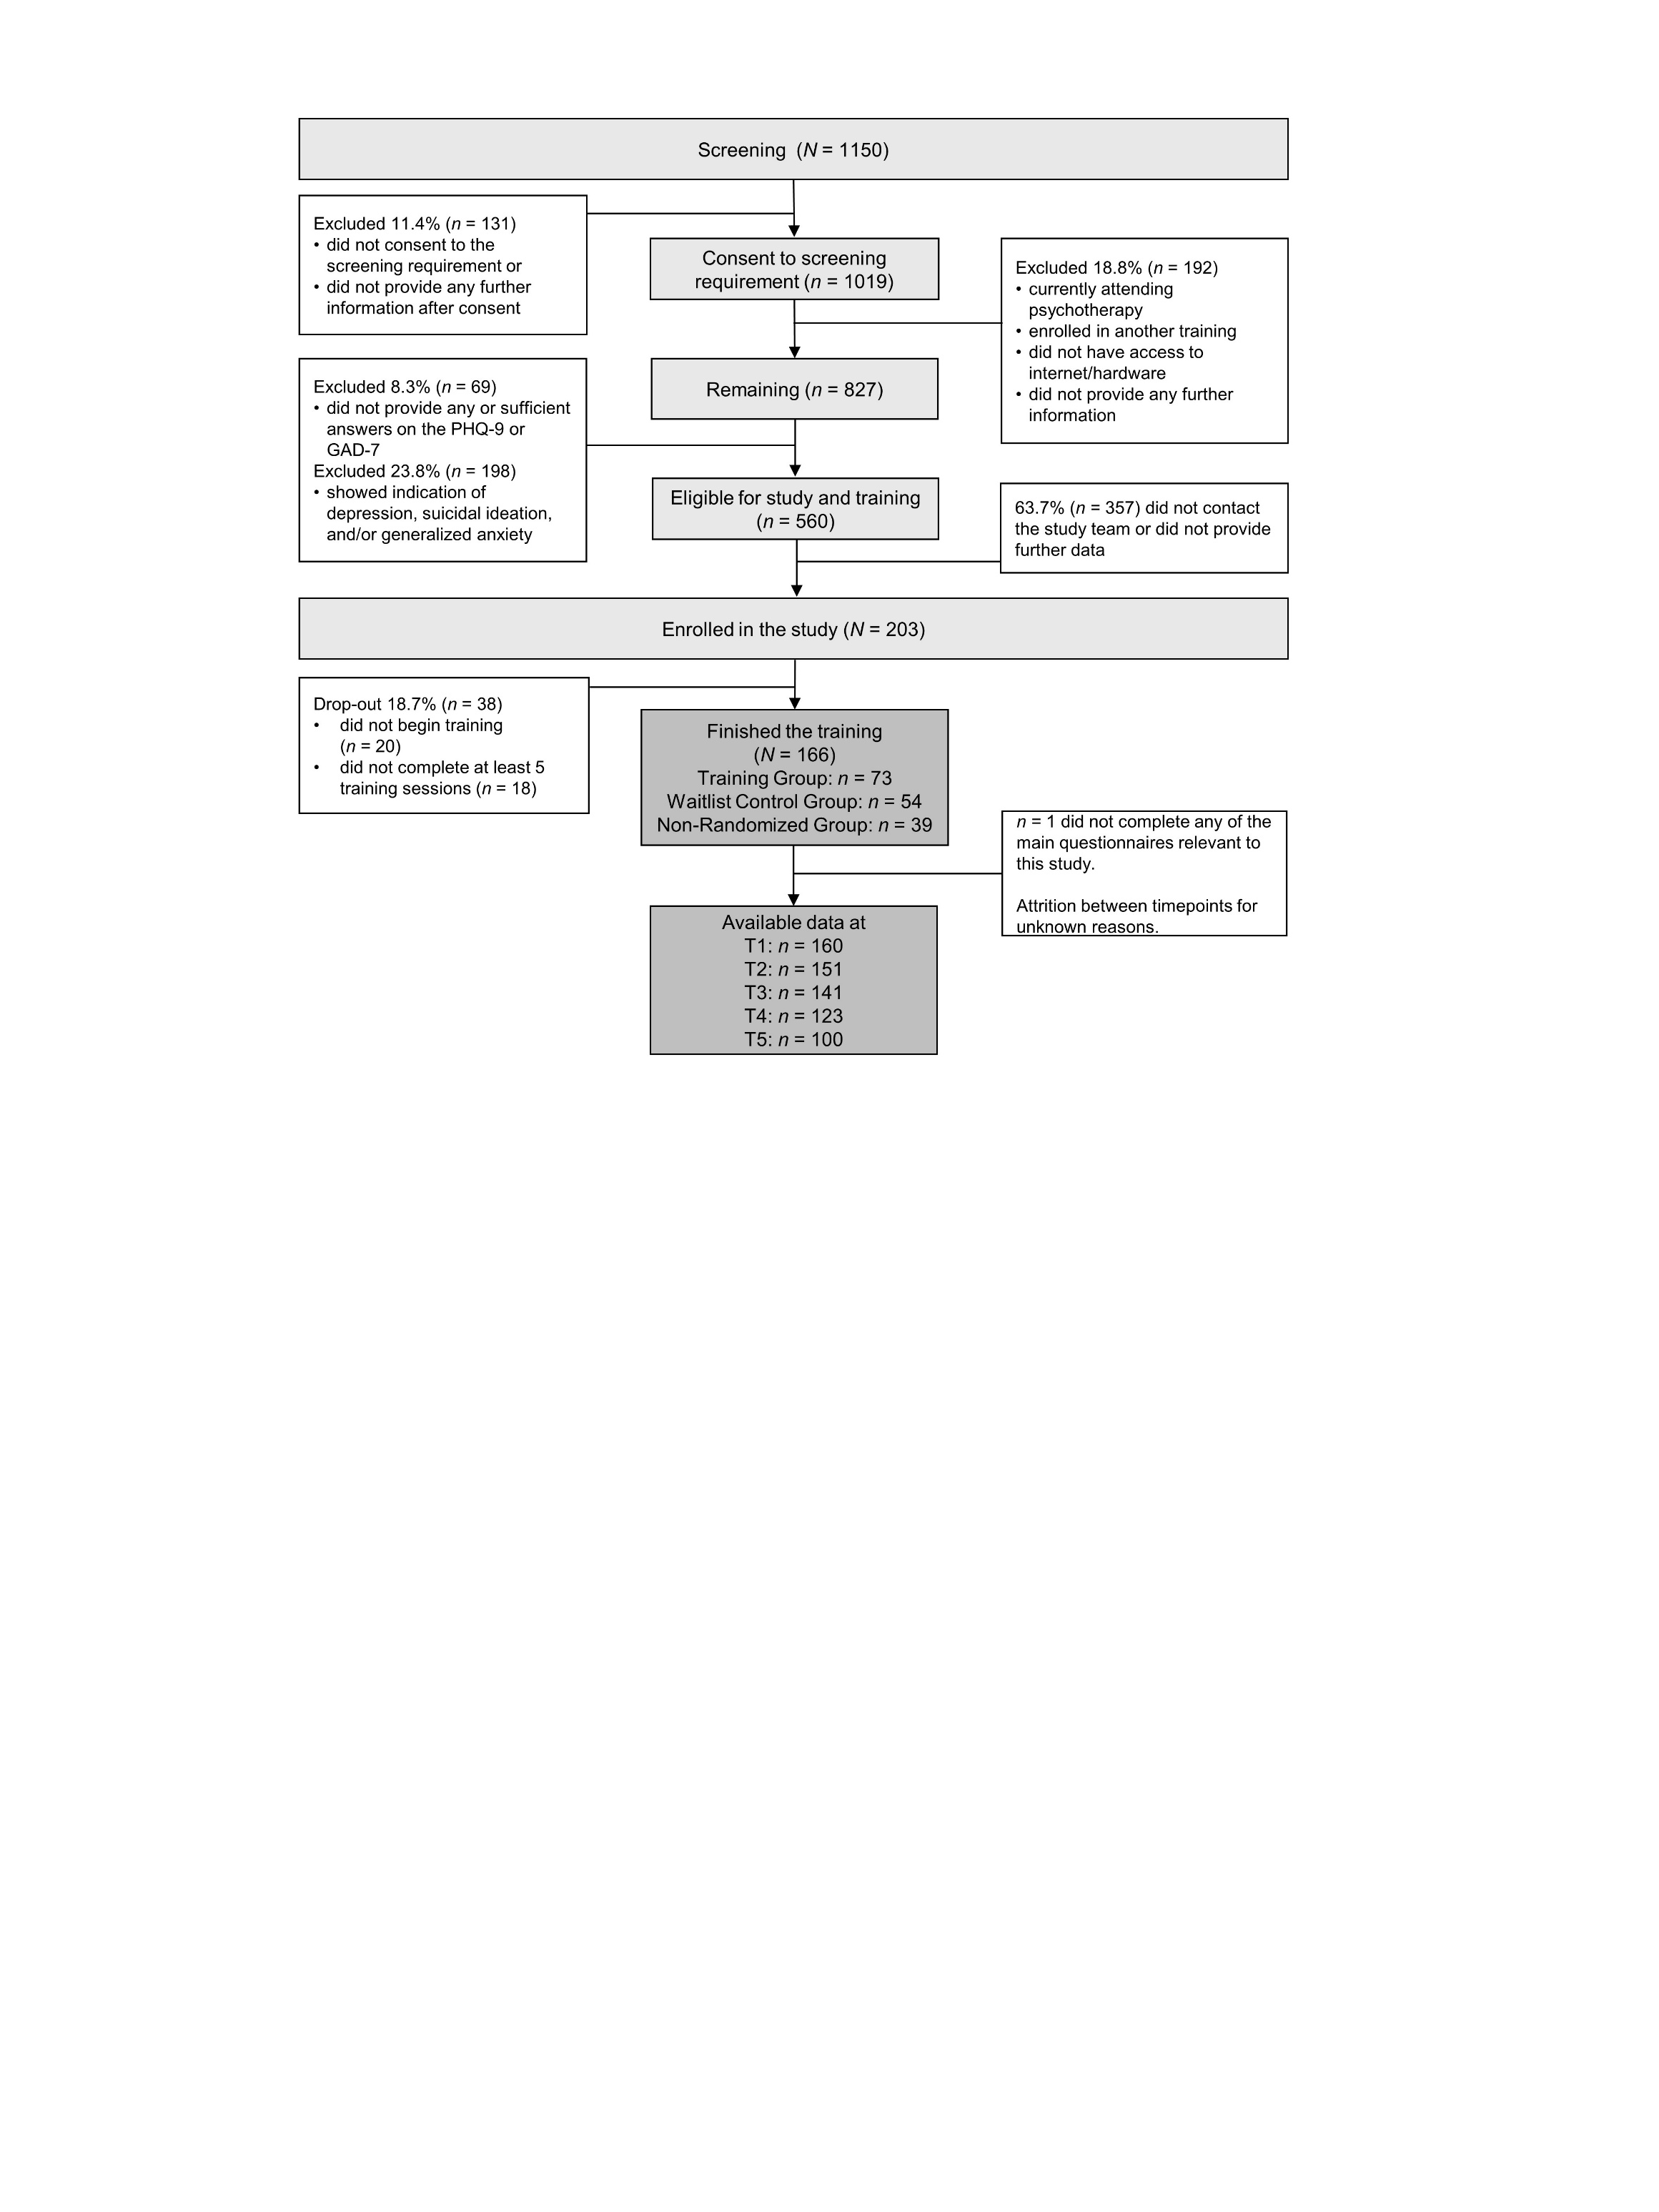
*Study Flow and Attrition*

*Note*. Reprinted from *reference blinded for review*. The figure depicts the study flow and attrition. Some individuals may have repeatedly participated in the screening. More than one exclusion criterion may apply to one individual. Not all participants who completed the training filled out all study questionnaires at all time points, therefore the *n* varies across time points.
